# Supplementary figures and images for: Ombro doloroso Painful shoulder
Source: Royal Society of Chemistry journal article supplement (doi:10.1039/c0cp01031f), 2008-01-01

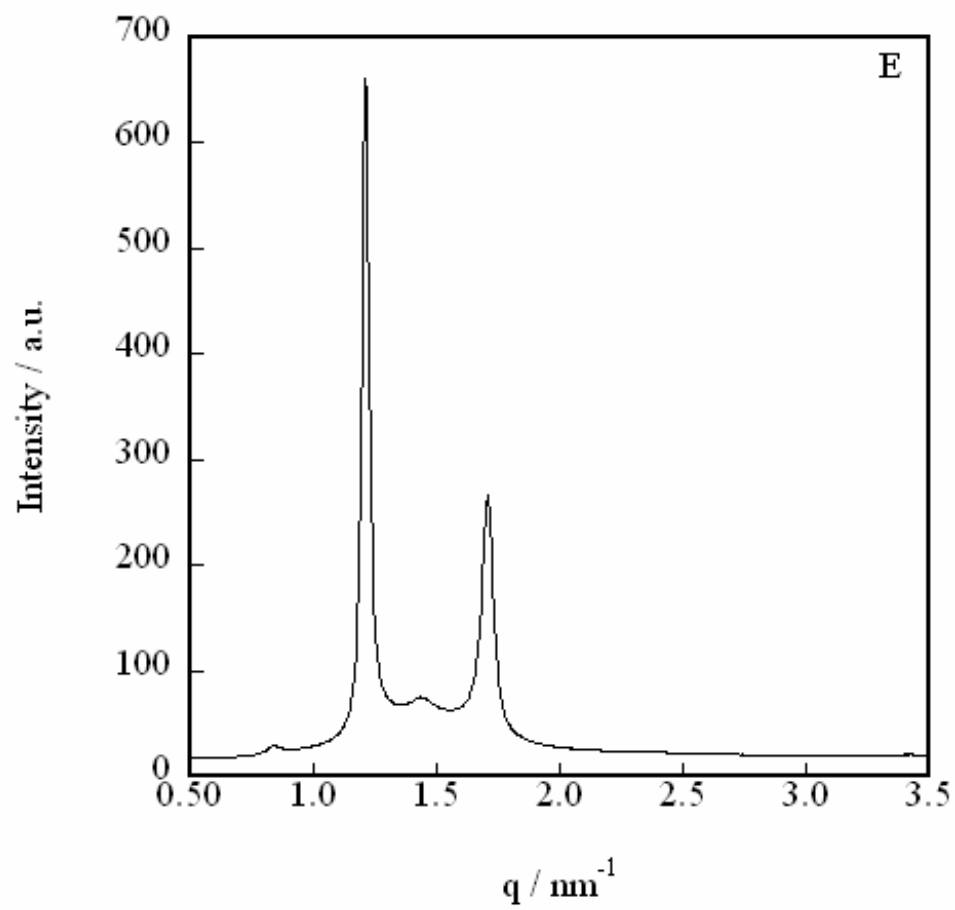

Supplement: c0cp01031f.pdf [file c0cp01031f.pdf]
